# Supplementary material
Source: PubMed Central journal article supplement (PMC4934036)
Supplement: jcav07p1273s2.pdf [file jcav07p1273s2.pdf]

Table S1.

| Author/publication year | Gene name | Polymorphisms | Disease              | Study design | Country   | Ethnicity | Control type | Genotyping method | Cases AA | Cases AB | Cases BB | Cases Ser/Ser | Cases Ser/CT | Cases Cys/Cys | Controls Ser/Ser | Controls Ser/CT | Controls Cys/Cys | Allele Cases Ser | Allele Cases Cys | controls Ser | controls Cys | Sample size Case | Sample size Control | HWE | NOS score |   |
|-------------------------|-----------|---------------|----------------------|--------------|-----------|-----------|--------------|-------------------|----------|----------|----------|---------------|--------------|---------------|------------------|-----------------|------------------|------------------|------------------|--------------|--------------|------------------|---------------------|-----|-----------|---|
| Huang 2008              | GGG1      | rs1052133     | biliary tract cancer | case-cont    | China     | Asian     | Populatic    | TaqMan            | Ser/Ser  | Ser/CT   | Cys/Cys  | 96            | 299          | 173           | 268              | 355             | 111              | 299              | 173              | 891          | 577          | 236              | 734                 | yes | 6         |   |
| Huang 2008              | GGG1      | rs1052133     | biliary tract cancer | case-cont    | China     | Asian     | Populatic    | TaqMan            | Ser/Ser  | Ser/CT   | Cys/Cys  | 66            | 74           | 32            | 289              | 380             | 114              | 206              | 138              | 958          | 608          | 172              | 783                 | yes | 6         |   |
| Jiao 2007               | GGG1      | rs1052133     | biliary tract cancer | case-cont    | China     | Asian     | Populatic    | PCR-RFLP          | Ser/Ser  | Ser/CT   | Cys/Cys  | 88            | 74           | 42            | 78               | 112             | 19               | 250              | 158              | 268          | 150          | 204              | 209                 | no  | 7         |   |
| Srivastava 2010         | GGG1      | rs1052133     | biliary tract cancer | case-cont    | India     | Asian     | Populatic    | PCR-RFLP          | Ser/Ser  | Ser/CT   | Cys/Cys  | 117           | 92           | 21            | 137              | 82              | 11               | 326              | 134              | 356          | 104          | 230              | 230                 | yes | 4         |   |
| Zeng 2013               | GGG1      | rs1052133     | biliary tract cancer | case-cont    | Thailand  | Asian     | Populatic    | PCR-RFLP          | Ser/Ser  | Ser/CT   | Cys/Cys  | 25            | 44           | 18            | 24               | 43              | 20               | 94               | 94               | 81           | 83           | 87               | 87                  | yes | 7         |   |
| Arizona 2008            | GGG1      | rs1052133     | bladder cancer       | case-cont    | Japan     | Asian     | Hospital     | PCR-RFLP          | Ser/Ser  | Ser/CT   | Cys/Cys  | 61            | 107          | 83            | 67               | 135             | 49               | 229              | 273              | 269          | 233          | 251              | 251                 | yes | 6         |   |
| Figuerola 2007          | GGG1      | rs1052133     | bladder cancer       | case-cont    | Spain     | Caucasior | Hospital     | TaqMan            | Ser/Ser  | Ser/CT   | Cys/Cys  | 649           | 383          | 56            | 596              | 361             | 61               | 1681             | 495              | 1553         | 483          | 1088             | 1018                | yes | 7         |   |
| Gangwar 2009            | GGG1      | rs1052133     | bladder cancer       | case-cont    | India     | Asian     | Hospital     | PCR-RFLP          | Ser/Ser  | Ser/CT   | Cys/Cys  | 92            | 93           | 27            | 122              | 111             | 17               | 277              | 147              | 355          | 145          | 212              | 250                 | yes | 6         |   |
| Huang 2007              | GGG1      | rs1052133     | bladder cancer       | case-cont    | USA       | Caucasior | Populatic    | TaqMan            | Ser/Ser  | Ser/CT   | Cys/Cys  | 375           | 228          |               | 348              | 260             |                  |                  |                  |              |              | 603              | 608                 | no  | 6         |   |
| Karahalil 2006          | GGG1      | rs1052133     | bladder cancer       | case-cont    | Turkey    | Caucasior | Populatic    | PCR-RFLP          | Ser/Ser  | Ser/CT   | Cys/Cys  | 40            | 47           | 12            | 62               | 20              | 18               | 127              | 71               | 144          | 56           | 99               | 100                 | no  | 6         |   |
| Kim 2005                | GGG1      | rs1052133     | bladder cancer       | case-cont    | Korea     | Asian     | Hospital     | PCR-RFLP          | Ser/Ser  | Ser/CT   | Cys/Cys  | 37            | 90           | 26            | 38               | 70              | 45               | 164              | 142              | 146          | 160          | 153              | 153                 | yes | 6         |   |
| Ma 2012                 | GGG1      | rs1052133     | bladder cancer       | case-cont    | China     | Asian     | Hospital     | TaqMan            | Ser/Ser  | Ser/CT   | Cys/Cys  | 155           | 551          | 344           | 212              | 676             | 514              | 861              | 1239             | 1100         | 1704         | 1050             | 1402                | yes | 7         |   |
| Matullo 2006            | GGG1      | rs1052133     | bladder cancer       | case-cont    | European  | Caucasior | Populatic    | PE/DHPLC          | Ser/Ser  | Ser/CT   | Cys/Cys  | 78            | 40           | 6             | 673              | 371             | 50               | 196              | 52               | 1717         | 471          | 124              | 1094                | yes | 8         |   |
| Mittal 2012             | GGG1      | rs1052133     | bladder cancer       | case-cont    | India     | Asian     | Populatic    | ARMS              | Ser/Ser  | Ser/CT   | Cys/Cys  | 92            | 93           | 27            | 122              | 111             | 17               | 277              | 147              | 355          | 145          | 212              | 250                 | yes | 7         |   |
| Narter 2009             | GGG1      | rs1052133     | bladder cancer       | case-cont    | Turkey    | Caucasior | Hospital     | PCR-RFLP          | Ser/Ser  | Ser/CT   | Cys/Cys  | 37            | 13           | 8             | 18               | 18              | 0                | 87               | 29               | 54           | 18           | 58               | 36                  | no  | 6         |   |
| Ramanuj 2014            | GGG1      | rs1052133     | bladder cancer       | case-cont    | Belarus   | Caucasior | Populatic    | PCR-RFLP          | Ser/Ser  | Ser/CT   | Cys/Cys  | 223           | 94           | 18            | 221              | 132             | 13               | 540              | 130              | 574          | 158          | 335              | 366                 | yes | 7         |   |
| Wu 2006                 | GGG1      | rs1052133     | bladder cancer       | case-cont    | USA       | mixed     | Populatic    | TaqMan            | Ser/Ser  | Ser/CT   | Cys/Cys  | 375           | 209          | 29            | 348              | 216             | 36               | 959              | 267              | 912          | 288          | 613              | 600                 | yes | 7         |   |
| Cai 2006                | GGG1      | rs1052133     | breast cancer        | case-cont    | China     | Asian     | Populatic    | TaqMan            | Ser/Ser  | Ser/CT   | Cys/Cys  | 186           | 534          | 382           | 214              | 537             | 416              | 906              | 1298             | 965          | 1369         | 1102             | 1167                | yes | 6         |   |
| Choi 2003               | GGG1      | rs1052133     | breast cancer        | case-cont    | Korea/Jap | Asian     | Hospital     | PCR-RFLP          | Ser/Ser  | Ser/CT   | Cys/Cys  | 105           | 227          | 134           | 111              | 244             | 113              | 437              | 495              | 466          | 470          | 466              | 468                 | yes | 6         |   |
| Hsu 2010                | GGG1      | rs1052133     | breast cancer        | case-cont    | Taiwan    | Asian     | Populatic    | TaqMan            | Ser/Ser  | Ser/CT   | Cys/Cys  | 64            | 165          | 172           | 87               | 231             | 215              | 293              | 509              | 405          | 661          | 401              | 533                 | yes | 6         |   |
| Kim 2013                | GGG1      | rs1052133     | breast cancer        | case-cont    | Korea     | Asian     | Hospital     | BeadArray         | Ser/Ser  | Ser/CT   | Cys/Cys  | 73            | 181          | 92            | 86               | 185             | 90               | 327              | 365              | 357          | 365          | 346              | 361                 | yes | 7         |   |
| Loizidou 2009           | GGG1      | rs1052133     | breast cancer        | case-cont    | Cyprus    | mixed     | Populatic    | TaqMan            | Ser/Ser  | Ser/CT   | Cys/Cys  | 615           | 422          | 71            | 647              | 455             | 72               | 1652             | 564              | 1749         | 599          | 1108             | 1174                | yes | 6         |   |
| Luo 2014                | GGG1      | rs1052133     | breast cancer        | case-cont    | China     | Asian     | Populatic    | PCR-CITPP         | Ser/Ser  | Ser/CT   | Cys/Cys  | 42            | 87           | 65            | 45               | 107             | 93               | 171              | 217              | 197          | 293          | 194              | 245                 | yes | 7         |   |
| Roberts 2011            | GGG1      | rs1052133     | breast cancer        | case-cont    | USA       | mixed     | Populatic    | MALDI-TOF         | Ser/Ser  | Ser/CT   | Cys/Cys  | 634           | 366          | 54            | 1125             | 670             | 92               | 1634             | 474              | 2920         | 854          | 1054             | 1887                | yes | 7         |   |
| Romanowicz-Makowski     | GGG1      | rs1052133     | breast cancer        | case-cont    | Poland    | Caucasior | Hospital     | PCR-RFLP          | Ser/Ser  | Ser/CT   | Cys/Cys  | 32            | 34           | 4             | 20               | 52              | 34               | 98               | 102              | 92           | 120          | 100              | 106                 | yes | 6         |   |
| Rosner 2006             | GGG1      | rs1052133     | breast cancer        | case-cont    | USA       | Caucasior | Populatic    | FP-TDI            | Ser/Ser  | Ser/CT   | Cys/Cys  | 615           | 375          | 51            | 653              | 385             | 55               | 1605             | 477              | 1691         | 495          | 1041             | 1093                | yes | 6         |   |
| Sangrajang 2008         | GGG1      | rs1052133     | breast cancer        | case-cont    | Thailand  | Asian     | Hospital     | HRM               | Ser/Ser  | Ser/CT   | Cys/Cys  | 112           | 232          | 162           | 104              | 217             | 103              | 456              | 556              | 425          | 423          | 506              | 424                 | yes | 6         |   |
| Smolarz 2014            | GGG1      | rs1052133     | breast cancer        | case-cont    | Poland    | Caucasior | Hospital     | PCR-RFLP          | Ser/Ser  | Ser/CT   | Cys/Cys  | 16            | 39           | 15            | 16               | 38              | 16               | 71               | 69               | 70           | 70           | 70               | 70                  | yes | 6         |   |
| Sterpone 2010           | GGG1      | rs1052133     | breast cancer        | case-cont    | Italy     | Caucasior | Populatic    | PCR-SSCP          | Ser/Ser  | Ser/CT   | Cys/Cys  | 18            | 23           | 2             | 17               | 15              | 2                | 59               | 27               | 49           | 19           | 43               | 34                  | yes | 6         |   |
| Synowiec 2008           | GGG1      | rs1052133     | breast cancer        | case-cont    | Poland    | Caucasior | Hospital     | PCR-RFLP          | Ser/Ser  | Ser/CT   | Cys/Cys  | 10            | 19           | 12            | 4                | 23              | 21               | 39               | 43               | 31           | 65           | 41               | 48                  | yes | 6         |   |
| Vogel 2003              | GGG1      | rs1052133     | breast cancer        | case-cont    | Denmark   | nested ce | Caucasior    | Populatic         | TaqMan   | Ser/Ser  | Ser/CT   | Cys/Cys       | 256          | 147           | 22               | 245             | 169              | 20               | 659              | 191          | 659          | 209              | 425                 | 434 | yes       | 8 |
| Xie 2013                | GGG1      | rs1052133     | breast cancer        | case-cont    | China     | Asian     | Populatic    | HRM               | Ser/Ser  | Ser/CT   | Cys/Cys  | 96            | 310          | 224           | 137              | 401             | 239              | 502              | 758              | 675          | 879          | 630              | 777                 | yes | 6         |   |
| Zhang 2006              | GGG1      | rs1052133     | breast cancer        | case-cont    | USA       | Caucasior | Populatic    | TaqMan            | Ser/Ser  | Ser/CT   | Cys/Cys  | 967           | 532          | 72            | 760              | 424             | 60               | 2466             | 676              | 1944         | 544          | 1571             | 1244                | yes | 6         |   |
| Brevik 2010             | GGG1      | rs1052133     | colorectal cancer    | case-cont    | USA       | mixed     | Family       | TaqMan            | Ser/Ser  | Ser/CT   | Cys/Cys  | 172           | 117          | 19            | 217              | 127             | 18               | 461              | 155              | 561          | 163          | 308              | 362                 | yes | 6         |   |
| Canbay 2011             | GGG1      | rs1052133     | colorectal cancer    | case-cont    | Turkey    | Caucasior | Populatic    | PCR-RFLP          | Ser/Ser  | Ser/CT   | Cys/Cys  | 31            | 40           | 8             | 171              | 69              | 7                | 102              | 56               | 411          | 83           | 79               | 247                 | yes | 7         |   |
| Curtin 2009             | GGG1      | rs1052133     | colorectal cancer    | case-cont    | USA       | Caucasior | Populatic    | TaqMan            | Ser/Ser  | Ser/CT   | Cys/Cys  | 918           | 570          | 94            | 1172             | 686             | 93               | 2406             | 758              | 3030         | 872          | 1582             | 1951                | yes | 6         |   |
| Engin 2010              | GGG1      | rs1052133     | colorectal cancer    | case-cont    | Turkey    | Caucasior | Hospital     | PCR-RFLP          | Ser/Ser  | Ser/CT   | Cys/Cys  | 50            | 43           | 17            | 51               | 47              | 18               | 143              | 77               | 149          | 83           | 110              | 116                 | yes | 6         |   |
| Gil 2012                | GGG1      | rs1052133     | colorectal cancer    | case-cont    | Poland    | Caucasior | Hospital     | PCR-RFLP          | Ser/Ser  | Ser/CT   | Cys/Cys  | 87            | 41           | 4             | 67               | 33              | 0                | 215              | 49               | 167          | 33           | 132              | 100                 | no  | 6         |   |
| Hansen 2005             | GGG1      | rs1052133     | colorectal cancer    | case-cont    | Norway    | Caucasior | Populatic    | TaqMan            | Ser/Ser  | Ser/CT   | Cys/Cys  | 101           | 55           | 9             | 208              | 164             | 24               | 257              | 73               | 580          | 212          | 165              | 396                 | yes | 6         |   |
| Hansen 2009             | GGG1      | rs1052133     | colorectal cancer    | case-cont    | Denmark   | nested ce | Caucasior    | Populatic         | TaqMan   | Ser/Ser  | Ser/CT   | Cys/Cys       | 220          | 137           | 16               | 467             | 277              | 32               | 577              | 169          | 1211         | 341              | 373                 | 776 | yes       | 8 |
| Kasahara 2008           | GGG1      | rs1052133     | colorectal cancer    | case-cont    | Japan     | Asian     | Hospital     | PCR-RFLP          | Ser/Ser  | Ser/CT   | Cys/Cys  | 17            | 38           | 13            | 39               | 54              | 28               | 72               | 64               | 132          | 110          | 68               | 121                 | yes | 6         |   |
| Kim 2003                | GGG1      | rs1052133     | colorectal cancer    | case-cont    | Korea     | Asian     | Populatic    | PCR-RFLP          | Ser/Ser  | Ser/CT   | Cys/Cys  | 24            | 66           | 35            | 52               | 131             | 64               | 114              | 136              | 235          | 259          | 125              | 247                 | yes | 6         |   |
| Moreno 2006             | GGG1      | rs1052133     | colorectal cancer    | case-cont    | Spain     | Caucasior | Hospital     | Microarray        | Ser/Ser  | Ser/CT   | Cys/Cys  | 225           | 114          | 23            | 210              | 104             | 9                | 564              | 160              | 524          | 122          | 362              | 323                 | yes | 7         |   |
| Obtulowicz 2010         | GGG1      | rs1052133     | colorectal cancer    | case-cont    | Poland    | Caucasior | Hospital     | PCR-SSCP          | Ser/Ser  | Ser/CT   | Cys/Cys  | 38            | 19           | 17            | 63               | 33              | 1                | 95               | 53               | 159          | 35           | 74               | 97                  | no  | 8         |   |
| Pardini 2008            | GGG1      | rs1052133     | colorectal cancer    | case-cont    | Czech     | Caucasior | Hospital     | PCR-RFLP          | Ser/Ser  | Ser/CT   | Cys/Cys  | 336           | 168          | 28            | 331              | 181             | 20               | 840              | 224              | 843          | 221          | 532              | 532                 | yes | 6         |   |
| Park 2007               | GGG1      | rs1052133     | colorectal cancer    | case-cont    | Korea     | Asian     | Populatic    | TaqMan            | Ser/Ser  | Ser/CT   | Cys/Cys  | 91            | 220          | 128           | 120              | 333             | 223              | 402              | 476              | 573          | 779          | 439              | 676                 | yes | 6         |   |
| Przybyłowska 2013       | GGG1      | rs1052133     | colorectal cancer    | case-cont    | Poland    | Caucasior | Hospital     | PCR-RFLP          | Ser/Ser  | Ser/CT   | Cys/Cys  | 102           | 67           | 3             | 142              | 54              | 4                | 271              | 73               | 338          | 62           | 172              | 200                 | yes | 7         |   |
| Sameer 2012             | GGG1      | rs1052133     | colorectal cancer    | case-cont    | India     | Asian     | Hospital     | PCR-RFLP          | Ser/Ser  | Ser/CT   | Cys/Cys  | 66            | 41           | 7             | 100              | 89              | 11               | 173              | 55               | 289          | 111          | 114              | 200                 | yes | 6         |   |
| Sliwinski 2009          | GGG1      | rs1052133     | colorectal cancer    | case-cont    | Poland    | Caucasior | Hospital     | PCR-RFLP          | Ser/Ser  | Ser/CT   | Cys/Cys  | 52            | 46           | 2             | 68               | 28              | 4                | 150              | 50               | 164          | 36           | 100              | 100                 | yes | 6         |   |
| Stern 2007              | GGG1      | rs1052133     | colorectal cancer    | case-cont    | Singapore | Asian     | Populatic    | TaqMan            | Ser/Ser  | Ser/CT   | Cys/Cys  | 35            | 152          | 116           | 183              | 537             | 439              | 222              | 384              | 903          | 1415         | 303              | 1159                | yes | 8         |   |
| Zhang 2014              | GGG1      | rs1052133     | colorectal cancer    | case-cont    | China     | Asian     | Hospital     | PCR-CITPP         | Ser/Ser  | Ser/CT   | Cys/Cys  | 44            | 111          | 92            | 48               | 139             | 113              | 199              | 295              | 235          |              |                  |                     |     |           |   |

|              |     |                           |           |           |           |           |           |         |         |         |     |     |    |     |     |    |      |     |      |     |     |      |     |   |
|--------------|-----|---------------------------|-----------|-----------|-----------|-----------|-----------|---------|---------|---------|-----|-----|----|-----|-----|----|------|-----|------|-----|-----|------|-----|---|
| Dhillon 2011 | GG1 | rs1052133 prostate cancer | case-cont | Australia | Caucasian | Hospital  | PCR-RFLP  | Ser/Ser | Ser/Cys | Cys/Cys | 38  | 57  | 21 | 69  | 50  | 12 | 133  | 99  | 188  | 74  | 116 | 131  | yes | 6 |
| Mittal 2012  | GG1 | rs1052133 prostate cancer | case-cont | India     | Asian     | Populatio | ARMS      | Ser/Ser | Ser/Cys | Cys/Cys | 98  | 83  | 14 | 136 | 100 | 14 | 279  | 111 | 372  | 128 | 195 | 250  | yes | 7 |
| Nam 2005     | GG1 | rs1052133 prostate cancer | case-cont | Canada    | mixed     | Hospital  | MS        | Ser/Ser | Ser/Cys | Cys/Cys | 593 | 350 | 53 | 617 | 386 | 89 | 1536 | 456 | 1620 | 564 | 996 | 1092 | no  | 9 |
| Nock 2006    | GG1 | rs1052133 prostate cancer | case-cont | USA       | mixed     | Family    | PCR-RFLP  | Ser/Ser | Ser/Cys | Cys/Cys | 280 | 135 | 24 | 305 | 142 | 31 | 695  | 183 | 752  | 204 | 439 | 478  | no  | 6 |
| Xu 2002      | GG1 | rs1052133 prostate cancer | case-cont | USA       | mixed     | Hospital  | sequencir | Ser/Ser | Ser/Cys | Cys/Cys | 182 | 106 | 10 | 96  | 63  | 15 | 470  | 126 | 255  | 93  | 298 | 174  | yes | 6 |
| Zhang 2010   | GG1 | rs1052133 prostate cancer | case-cont | USA       | mixed     | Populatio | MS        | Ser/Ser | Ser/Cys | Cys/Cys | 126 | 61  | 4  | 118 | 71  | 7  | 313  | 69  | 307  | 85  | 191 | 196  | yes | 7 |
| Zhou 2013    | GG1 | rs1052133 prostate cancer | case-cont | China     | Asian     | Hospital  | PCR-RFLP  | Ser/Ser | Ser/Cys | Cys/Cys | 22  | 52  | 26 | 29  | 57  | 14 | 96   | 104 | 115  | 85  | 100 | 100  | yes | 5 |
